# Supplementary material
Source: PubMed Central journal article supplement (PMC5546878)
Supplement: NIHMS875765-supplement-Additional_resources.pdf [file NIHMS875765-supplement-Additional_resources.pdf]

MATLAB Software to enable use of the statistical model is available at

<https://sourceforge.net/projects/ncspline/>

#### **ADDITIONAL RESOURCES**

None

#### **SUPPLEMENTAL DATASETS**

**Dataset S1. Related to Figures 1 and 2 and STAR Methods section “Selected Reaction Monitoring Proteomics” (Attached as Excel spreadsheet). SRM parameters and intensities.** List of detected SRM transitions and intensities as measured by peak area integration in Skyline software. Transitions and raw intensities are compiled from 3 data sets, across 7 injections, before normalization with housekeeping proteins.

**Dataset S2. Related to Figures 1 and 2 and STAR Methods section “Ribosome profiling and mRNA-seq” (Attached as Excel spreadsheet). RPKM of genes monitored by ribosome profiling and mRNA seq and biological processes in Upreg and Downreg transcripts in response to bortezomib treatment.** “MM1.S – DAVID analysis” sheet includes most enriched results from DAVID analysis (32) with default settings and human as species in MM1.S experiments. Top five most enriched terms shown measured from “Upreg” and “Downreg” clusters, as in Figure S2A.

**Dataset S3. Related to Figures 2 and 4 and STAR Methods section “Estimation of absolute protein copy number at baseline” (Attached as Excel spreadsheet).**

**iBAQ values.** MM1.S and EBV-immortalized B-cell tryptic peptide samples were analyzed using the iBAQ algorithm implemented in MaxQuant. For comparison to SRM and sequencing data, proteins were matched based both on UniProt identifier in MaxQuant protein group and gene name.

**Dataset S4. Related to Figures 2 and 4 and STAR Methods section “Prediction of translational rate parameters and protein synthesis rates using ribosome profiling and RNA-seq measurements” (Attached as Excel spreadsheet).**

**Master dataset used for model calculations in both MM1.S and EBV-immortalized B-cell experiments and estimation and prediction of translational rate parameter  $k_g^s(t)$  and protein synthesis rates in MM1.S experiments.**

Absolute protein abundance (SRM intensity scaled by baseline iBAQ values; all values baseline corrected for “heavy” channel intensity at 0h) and mRNA and ribosome footprint density mapping to gene across the time course. All the values in this dataset are the fitted values by functional data analysis. “MM1.S - estimation & prediction” sheet includes the Pearson correlation coefficient and relative mean absolute error (RMAE) of the estimation and prediction of translational rate parameter and protein synthesis rate averaged over all the genes were compared to those between the two mass spectrometry replicates We define the relative mean absolute error between two time series  $f_1(t)$  and  $f_2(t)$  as  $\frac{1}{T} \int_0^T |f_1(t) - f_2(t)| / |f_2(0)| dt$ .

## KEY RESOURCES TABLE

| REAGENT or RESOURCE                                                        | SOURCE                         | IDENTIFIER                 |
|----------------------------------------------------------------------------|--------------------------------|----------------------------|
| <b>Antibodies</b>                                                          |                                |                            |
| Rabbit monoclonal anti-GAPDH                                               | Cell Signaling Technology      | Cat# 2118L                 |
| Rabbit monoclonal anti-vimentin                                            | Cell Signaling Technology      | Cat# 5741P                 |
| Rabbit polyclonal anti-Bid                                                 | Cell Signaling Technology      | Cat# 2002P                 |
| Mouse monoclonal anti-puromycin                                            | KeraFast                       | Cat# 3RH11                 |
| Rabbit monoclonal anti-4E-BP1                                              | Cell Signaling Technology      | Cat# 53H11                 |
| Rabbit monoclonal anti-phospho-4E-BP1 (T37/46)                             | Cell Signaling Technology      | Cat# 236B4                 |
| <b>Chemicals, Peptides, and Recombinant Proteins</b>                       |                                |                            |
| Bortezomib                                                                 | LC Laboratories                | B-1408                     |
| Cycloheximide                                                              | Sigma-Aldrich                  | Cat# C4859; CAS: 66-81-9   |
| L-Lysine 4,4,5,5-D4 (Lys4)                                                 | Cambridge Isotope Laboratories | Cat# DLM-2640              |
| L-Arginine <sup>13</sup> C <sub>6</sub> (Arg6)                             | Cambridge Isotope Laboratories | Cat# CLM-2265-H            |
| L-Lysine <sup>13</sup> C <sub>6</sub> <sup>15</sup> N <sub>2</sub> (Lys8)  | Cambridge Isotope Laboratories | Cat# CNLM-291-H            |
| L-Lysine <sup>13</sup> C <sub>6</sub> <sup>15</sup> N <sub>4</sub> (Arg10) | Cambridge Isotope Laboratories | Cat# CNLM-593-H            |
| L-Lysine                                                                   | Sigma-Aldrich                  | Cat# 8662; CAS: 657-27-2   |
| L-Arginine                                                                 | Sigma-Aldrich                  | Cat# A6969; CAS: 1119-34-2 |
| TRIzol® reagent                                                            | Life Technologies              | Cat# 15596026              |
| HALT protease and phosphatase inhibitor single use cocktail                | Thermo Fisher                  | Cat# 78443                 |
| Sequencing Grade Modified Trypsin                                          | Promega                        | Cat# V5111                 |
| GAPDH recombinant protein                                                  | Abcam                          | Cat# ab82633               |
| Vimentin recombinant protein                                               | Peptrotech                     | Cat# 110-10                |
| Bid recombinant protein                                                    | Sino Biological                | Cat# 10468-HNCE-59         |
| <b>Critical Commercial Assays</b>                                          |                                |                            |
| Rneasy mini kit                                                            | QIAGEN                         | Cat# 74104                 |
| Quantifluor RNA assay                                                      | Promega                        | Cat# E3310                 |
| Oligo(dT)25 Magnetic Beads kit                                             | New England BioLabs            | Cat# S1419S                |
| Pierce™ BCA Protein Assay Kit                                              | Thermo Fisher Scientific       | Cat# 23225                 |
| SepPak C18 columns                                                         | Waters                         | Cat# WAT020515             |
| CellTiter-Glo® Luminescent Cell Viability Assay                            | Promega                        | Cat# G7570                 |
| Caspase-Glo® 3/7 Assay Systems                                             | Promega                        | Cat# G8090                 |
| Invitrogen MyOne streptavidin C1 dynabeads                                 | Thermo Fisher                  | Cat# 65001                 |
| <b>Deposited Data</b>                                                      |                                |                            |

|                                                                                                                                                                             |                                                              |                                                                                                                                                                                         |
|-----------------------------------------------------------------------------------------------------------------------------------------------------------------------------|--------------------------------------------------------------|-----------------------------------------------------------------------------------------------------------------------------------------------------------------------------------------|
| Raw genetic sequencing data                                                                                                                                                 | This paper                                                   | <a href="http://www.ncbi.nlm.nih.gov/geo/query/acc.cgi?token=chohoqacvbyffwf&amp;acc=GSE69047">http://www.ncbi.nlm.nih.gov/geo/query/acc.cgi?token=chohoqacvbyffwf&amp;acc=GSE69047</a> |
| Raw SRM data                                                                                                                                                                | This paper                                                   | <a href="https://panoramaweb.org/labkey/translation_model_2015.url">https://panoramaweb.org/labkey/translation_model_2015.url</a>                                                       |
| Human reference genome NCBI build 37, GRCh37                                                                                                                                | Genome Reference Consortium                                  | <a href="http://www.ncbi.nlm.nih.gov/projects/genome/assembly/grc/human/">http://www.ncbi.nlm.nih.gov/projects/genome/assembly/grc/human/</a>                                           |
| HMCL66_Transcript_Expression_FPKM                                                                                                                                           | Keats Lab (Translational Genomics Research Institute, USA)   | <a href="http://www.keatslab.org/data-repository">http://www.keatslab.org/data-repository</a>                                                                                           |
| <b>Experimental Models: Cell Lines</b>                                                                                                                                      |                                                              |                                                                                                                                                                                         |
| MM.1S                                                                                                                                                                       | ATCC                                                         | Cat# CRL-2974                                                                                                                                                                           |
| EBV-transformed B-cell                                                                                                                                                      | Markus Muschen (University of California San Francisco, USA) | N/A                                                                                                                                                                                     |
| <b>Sequence-Based Reagents</b>                                                                                                                                              |                                                              |                                                                                                                                                                                         |
| miRNA Cloning Linker 1 DNA oligo: 5' AppCTGTAGGCACCATCAAT/3ddC 3'                                                                                                           | IDT                                                          | N/A                                                                                                                                                                                     |
| rRNA subtraction DNA oligo oNTI309: (biotin)-TCCTCCCGGGGCTACGCCTGTCTGAGCGTCGCT                                                                                              | IDT                                                          | N/A                                                                                                                                                                                     |
| rRNA subtraction DNA oligo oNTI301r : (biotin)-GGCCTCGATCAGAAGGACTTGGGCCCCCCACGA                                                                                            | IDT                                                          | N/A                                                                                                                                                                                     |
| rRNA subtraction DNA oligo oNTI305r : (biotin)-GGCGAGACGGCCGGTGGTGCGCCCTCGGCGGA                                                                                             | IDT                                                          | N/A                                                                                                                                                                                     |
| rRNA subtraction DNA oligo oNTI307hr : (biotin)-GCGGGGACCGGCTATCCGAGGCCAACCGAGGCTC                                                                                          | IDT                                                          | N/A                                                                                                                                                                                     |
| rRNA subtraction DNA oligo oNTI298r : (biotin)-TGATCTGATAAATGCACGCATCCCCC                                                                                                   | IDT                                                          | N/A                                                                                                                                                                                     |
| rRNA subtraction DNA oligo oNTI303hr : (biotin)-CGCGCCGTGGGAGGGTGGCCCGGCC                                                                                                   | IDT                                                          | N/A                                                                                                                                                                                     |
| Rev Transcription DNA oligo oNTI225-Link1 (DNA): 5'/5Phos/GATCGTCGGACTGTAGAACTCTGAACCTGT CCGTGGTCGCCGTATCATT/iSp18/CACTCA/iSp18/CAAGCAGAAGACGGCATAACGAATTGATGGTGCCCTACAG 3' | IDT                                                          | N/A                                                                                                                                                                                     |
| Amplification DNA primer oNTI230 (DNA): 5'-AATGATACGGCGACCACCGA                                                                                                             | IDT                                                          | N/A                                                                                                                                                                                     |
| Amplification DNA primer oNTI231 (DNA): 5'-CAAGCAGAAGACGGCATAACGA                                                                                                           | IDT                                                          | N/A                                                                                                                                                                                     |
| <b>Software and Algorithms</b>                                                                                                                                              |                                                              |                                                                                                                                                                                         |
| MaxQuant v1.5.1.2                                                                                                                                                           | Cox and Mann, 2008                                           | <a href="http://www.biochem.mpg.de/5111795/maxquant">http://www.biochem.mpg.de/5111795/maxquant</a>                                                                                     |

|                               |                              |                                                                                                                                       |
|-------------------------------|------------------------------|---------------------------------------------------------------------------------------------------------------------------------------|
| Skyline v2.5                  | MacLean <i>et al.</i> , 2010 | <a href="https://skyline.ms/project/home/software/Skyline/begin.view">https://skyline.ms/project/home/software/Skyline/begin.view</a> |
| Ribomap                       | Wang <i>et al.</i> , 2016    | <a href="https://github.com/Kingsford-Group/ribomap">https://github.com/Kingsford-Group/ribomap</a>                                   |
| Star v.2.4.0j                 | Dobin <i>et al.</i> , 2012   | <a href="https://github.com/alxdobin/STAR/releases/tag/STAR_2.4.0j">https://github.com/alxdobin/STAR/releases/tag/STAR_2.4.0j</a>     |
| Cluster 3.0                   | de Hoon <i>et al.</i> , 2004 | <a href="http://bonsai.hgc.jp/~mdehoon/software/cluster/software.htm">http://bonsai.hgc.jp/~mdehoon/software/cluster/software.htm</a> |
| Java TreeView                 | Saldanha, A.J. 2004          | <a href="http://jtreeview.sourceforge.net">http://jtreeview.sourceforge.net</a>                                                       |
| DAVID Bioinformatics Resource | Huang <i>et al.</i> , 2009   | <a href="http://david.ncifcrf.gov">http://david.ncifcrf.gov</a>                                                                       |
| MATLAB R2013a                 | Mathworks                    | <a href="http://www.mathworks.com/products/matlab/">http://www.mathworks.com/products/matlab/</a>                                     |
| MATLAB spline fit script      | This paper                   | <a href="https://sourceforge.net/projects/ncspline/">https://sourceforge.net/projects/ncspline/</a>                                   |
| Other                         |                              |                                                                                                                                       |
|                               |                              |                                                                                                                                       |
